# Supplementary figures and images for: Evaluation of the bioprotective potential of gastrointestinal digest fractions of Arthrospira sp. and Nannochloropsis sp. suspensions treated with high pressure homogenisation
Source: Royal Society of Chemistry journal article supplement (doi:10.1039/d3fb00193h), 2024-01-01

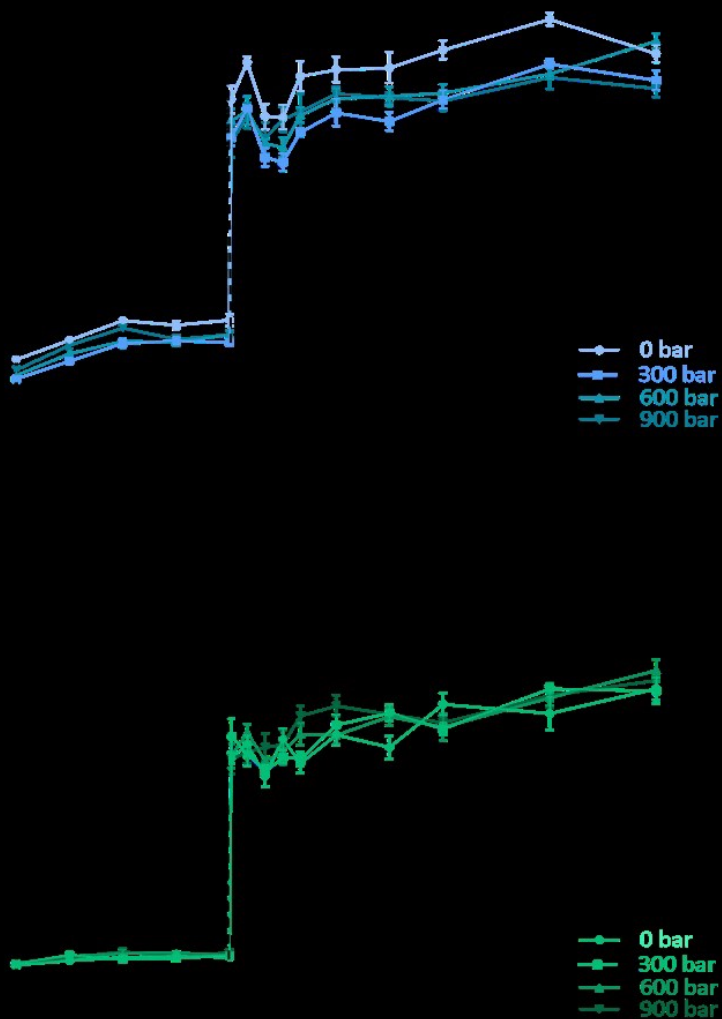

Supplement: d3fb00193h1.pdf [file d3fb00193h1.pdf]
